# Supplementary material
Source: publisher figshare collection journal article supplement (https://karger.figshare.com/ndownloader/files/31011010)
Supplement: Supplementary file 1 [file 31011010]

**Table E2:** identified TACI variants
